# Supplementary material for: A Distinct Nasal Microbiota Signature in Peritoneal Dialysis Patients
Source: PubMed Central journal article supplement (PMC10615377; doi:10.34067/kid.0000000000000249), 2023-08-29
Supplement: kidney360-4-01419-s001.pdf [file kidney360-4-01419-s001.pdf]

## Supplementary Materials

### A Distinct Nasal Microbiota Signature in Peritoneal Dialysis Patients

Iman Khan<sup>1</sup>, Sylvia Wu<sup>1</sup>, Anika Hudson<sup>1</sup>, Clayton Hughes<sup>1</sup>, Gabriel Stryjniak<sup>1</sup>, Lars F. Westblade<sup>2,3</sup>, Michael J. Satlin<sup>2,3</sup>, Nicholas Tedrow<sup>1</sup>, Anne-Catrin Uhlemann<sup>4</sup>, Colleen Kraft<sup>5</sup>, Darshana M. Dadhania<sup>1,6</sup>, Jeffrey Silberzweig<sup>1,7</sup>, Iwijn De Vlaminc<sup>8</sup>, Carol Li<sup>1</sup>, Vesh Srivatana<sup>1,7\*</sup>, John Richard Lee<sup>1,6\*</sup>

1. Division of Nephrology and Hypertension, Department of Medicine, Weill Cornell Medicine, New York, NY, USA
2. Department of Pathology and Laboratory Medicine, Weill Cornell Medicine, New York, NY, USA
3. Division of Infectious Diseases, Department of Medicine, Weill Cornell Medicine, New York, NY, USA
4. Division of Infectious Diseases, Department of Medicine, Vagelos College of Physicians and Surgeons Columbia University, New York, NY
5. Division of Infectious Diseases, Department of Medicine, Emory University School of Medicine, New York, NY
6. Department of Transplantation Medicine, New York Presbyterian Hospital–Weill Cornell Medical Center, New York, NY, USA
7. The Rogosin Institute, New York, NY, USA
8. Department of Biomedical Engineering, Cornell University, Ithaca, NY, USA

\* V.S. and J.R.L. contributed equally to this work. Correspondence to Dr. Vesh Srivatana, [ves2009@nyp.org](mailto:ves2009@nyp.org), or Dr. John R. Lee, [jrl2002@med.cornell.edu](mailto:jrl2002@med.cornell.edu)

## Table of Contents

|         |                   |
|---------|-------------------|
| Page 3  | SI Table 1        |
| Page 4  | SI Table 2        |
| Page 5  | SI Table 3        |
| Page 6  | SI Table 4        |
| Page 7  | SI Table <u>5</u> |
| Page 8  | SI Table 6        |
| Page 9  | SI Table 7        |
| Page 10 | SI Table 8        |
| Page 11 | SI Table 9        |

**SI Table 1**

| <i>Genus</i>                  | ASV                              | Base Mean | log2 Fold Change | Standard error | Wald stat | P value | Adj P value |
|-------------------------------|----------------------------------|-----------|------------------|----------------|-----------|---------|-------------|
| <i>Finegoldia ASV #1</i>      | 1f016ec26e4774c86f029301b556de28 | 24.3      | -26.4            | 2.9            | -9.0      | 3.4E-19 | 1.4E-17     |
| <i>Anaerococcus ASV #1</i>    | ae7cf0f32080cf5e62b3fbd903a997af | 16.5      | -25.9            | 3.0            | -8.7      | 2.2E-18 | 4.4E-17     |
| <i>Lawsonella ASV #1</i>      | b89dbfe5c74375ff3d4922b41c470740 | 49.0      | -7.3             | 2.9            | -2.5      | 1.3E-02 | 5.1E-02     |
| <i>Corynebacterium ASV #2</i> | c91b64f1467982a81922d331a310f5dc | 1172.2    | -3.7             | 1.6            | -2.2      | 2.5E-02 | 9.2E-02     |
| <i>Bacillus ASV #1</i>        | 5565e52f91bc244013249656795409ca | 18.7      | 6.9              | 1.8            | 3.8       | 1.7E-04 | 7.7E-04     |
| <i>Staphylococcus ASV #2</i>  | b273d7d05f0525bb87418b0138d90605 | 86.0      | 11.8             | 2.2            | 5.3       | 1.2E-07 | 6.1E-07     |
| <i>Porphyromonas ASV #1</i>   | 969732ae717bf5a9282f4781499aadb4 | 10.0      | 21.4             | 3.0            | 7.2       | 6.3E-13 | 3.6E-12     |
| <i>Abiotrophia ASV #1</i>     | afce1dc2c06acb90ad5d3da0fffbcd02 | 9.7       | 22.3             | 2.8            | 7.9       | 3.5E-15 | 2.4E-14     |
| <i>Streptococcus ASV #1</i>   | 4481bc66d3a54f79e6abb8b557a2a104 | 19.3      | 23.2             | 2.9            | 7.9       | 2.5E-15 | 2.4E-14     |
| <i>Staphylococcus ASV #1</i>  | 7b06c22a4ff85c9b2cbbf57a53462e13 | 41.9      | 23.4             | 3.0            | 7.9       | 3.6E-15 | 2.4E-14     |
| <i>Corynebacterium ASV #1</i> | 0560198302010f9b110d4ec9897e14d0 | 45.9      | 24.5             | 3.0            | 8.2       | 1.8E-16 | 2.3E-15     |

**DESeq2 Analysis of the Nasal Microbiota between the PD Group and the HC Group.** The listed amplicon sequence variant (ASV) were determined to be significantly different using an adjusted p value of 0.10. Base Mean, mean of normalized counts for all samples. Wald stat, Wald statistic. Positive log2 Fold Change is higher in the PD Group.

**SI Table 2**

| <i>Genus</i>                  | ASV                              | Base Mean | log <sub>2</sub> Fold Change | Standard error | Wald stat | P value | Adj P value |
|-------------------------------|----------------------------------|-----------|------------------------------|----------------|-----------|---------|-------------|
| <i>Staphylococcus ASV #3</i>  | 0f89ba63b47f3b624c13293cb4d56486 | 16.5      | -25.6                        | 2.9            | -8.8      | 1.9E-18 | 2.0E-16     |
| <i>Porphyromonas ASV #1</i>   | 969732ae717bf5a9282f4781499aadb4 | 7.4       | 21.6                         | 2.9            | 7.4       | 1.1E-13 | 4.8E-12     |
| <i>Abitrophia ASV #1</i>      | afce1dc2c06acb90ad5d3da0fffbcd02 | 7.3       | 23.3                         | 2.8            | 8.4       | 4.3E-17 | 3.0E-15     |
| <i>Corynebacterium ASV #3</i> | 36f00e24a741c19a5ee20f58919004ad | 12.4      | 24.0                         | 2.9            | 8.2       | 1.7E-16 | 8.8E-15     |
| <i>Staphylococcus ASV #2</i>  | b273d7d05f0525bb87418b0138d90605 | 65.8      | 24.8                         | 2.4            | 10.2      | 1.5E-24 | 3.1E-22     |

**DESeq2 Analysis of the Nasal Microbiota between the PD Group and the KTx Group.** The listed amplicon sequence variant (ASV) were determined to be significantly different using an adjusted p value of 0.10. Base Mean, mean of normalized counts for all samples. Wald stat, Wald statistic. Positive log<sub>2</sub> Fold Change is higher in the PD Group.

**SI Table 3**

| <i>Genus</i>                  | ASV                              | Base Mean | log2 Fold Change | Standard error | Wald stat | P value | Adj P value |
|-------------------------------|----------------------------------|-----------|------------------|----------------|-----------|---------|-------------|
| <i>Anaerococcus ASV #1</i>    | ae7cf0f32080cf5e62b3fbd903a997af | 12.0      | -25.4            | 3.0            | -8.5      | 2.8E-17 | 2.2E-15     |
| <i>Corynebacterium ASV #4</i> | 9f6c00ff9e1f455f42f211770d60dec0 | 11.2      | -25.3            | 3.0            | -8.4      | 3.6E-17 | 2.2E-15     |
| <i>Staphylococcus ASV #3</i>  | 0f89ba63b47f3b624c13293cb4d56486 | 12.5      | 21.6             | 3.0            | 7.2       | 7.4E-13 | 2.8E-11     |
| <i>Staphylococcus ASV #1</i>  | 7b06c22a4ff85c9b2cbbf57a53462e13 | 11.8      | 22.9             | 3.0            | 7.6       | 2.8E-14 | 1.3E-12     |
| <i>Corynebacterium ASV #1</i> | 0560198302010f9b110d4ec9897e14d0 | 237.4     | 27.1             | 3.0            | 9.0       | 2.2E-19 | 4.1E-17     |

**DESeq2 Analysis of the Nasal Microbiota between the KTx Group and the HC Group.** The listed amplicon sequence variant (ASV) were determined to be significantly different using an adjusted p value of 0.10. Base Mean, mean of normalized counts for all samples. Wald stat, Wald statistic. Positive log2 Fold Change is higher in the KTx Group.

**SI Table 4**

| Genus                            | Age $\geq$ 65    | Age < 65         | P value | Adj P value |
|----------------------------------|------------------|------------------|---------|-------------|
|                                  | n = 28           | n = 63           |         |             |
|                                  | Median Abundance | Median Abundance |         |             |
| <i>Staphylococcus</i>            | 0.187            | 0.346            | 0.11    | 0.40        |
| <i>Finegoldia</i>                | 0.000            | 0.001            | 0.11    | 0.40        |
| <i>Anaerococcus</i>              | 0.001            | 0.013            | 0.14    | 0.40        |
| <i>Moraxella</i>                 | 0.000            | 0.000            | 0.18    | 0.40        |
| <i>Unspecified Neisseriaceae</i> | 0.000            | 0.000            | 0.30    | 0.48        |
| <i>Streptococcus</i>             | 0.012            | 0.007            | 0.32    | 0.48        |
| <i>Corynebacterium</i>           | 0.124            | 0.139            | 0.56    | 0.72        |
| <i>Peptoniphilus</i>             | 0.000            | 0.000            | 0.66    | 0.74        |
| <i>Cutibacterium</i>             | 0.003            | 0.002            | 0.81    | 0.81        |

**Comparison of Nasal Microbiota Based on Patient's Age at the Genus Level.** P value was calculated between groups using Wilcoxon rank sum test. Adjusted p value (Adj P value) was calculated using Benjamini-Hochberg adjustment.

**SI Table 5**

| Genus                            | Female Sex       | Male Sex         | P value | Adj P value |
|----------------------------------|------------------|------------------|---------|-------------|
|                                  | n = 50           | n = 41           |         |             |
|                                  | Median Abundance | Median Abundance |         |             |
| <i>Peptoniphilus</i>             | 0.000            | 0.005            | 0.01    | 0.10        |
| <i>Finegoldia</i>                | 0.000            | 0.002            | 0.07    | 0.31        |
| <i>Anaerococcus</i>              | 0.002            | 0.017            | 0.19    | 0.51        |
| <i>Corynebacterium</i>           | 0.101            | 0.197            | 0.23    | 0.51        |
| <i>Cutibacterium</i>             | 0.002            | 0.007            | 0.38    | 0.64        |
| <i>Moraxella</i>                 | 0.000            | 0.000            | 0.43    | 0.64        |
| Unspecified <i>Neisseriaceae</i> | 0.000            | 0.000            | 0.90    | 0.91        |
| <i>Streptococcus</i>             | 0.008            | 0.010            | 0.90    | 0.91        |
| <i>Staphylococcus</i>            | 0.285            | 0.250            | 0.91    | 0.91        |

**Comparison of Nasal Microbiota Based on Patient's Sex at the Genus Level.** P value was calculated between groups using Wilcoxon rank sum test. Adjusted p value (Adj P value) was calculated using Benjamini-Hochberg adjustment.

**SI Table 6**

| Genus                            | Abx Hx 1 year                   | No Abx Hx 1 year                | P value | Adj P Value |
|----------------------------------|---------------------------------|---------------------------------|---------|-------------|
|                                  | (n = 63)<br>median<br>abundance | (n = 28)<br>median<br>abundance |         |             |
| <i>Moraxella</i>                 | 0.000                           | 0.000                           | 0.002   | 0.02        |
| <i>Peptoniphilus</i>             | 0.000                           | 0.007                           | 0.01    | 0.04        |
| <i>Cutibacterium</i>             | 0.000                           | 0.009                           | 0.01    | 0.04        |
| <i>Streptococcus</i>             | 0.010                           | 0.003                           | 0.05    | 0.10        |
| Unspecified <i>Neisseriaceae</i> | 0.000                           | 0.002                           | 0.06    | 0.10        |
| <i>Staphylococcus</i>            | 0.275                           | 0.211                           | 0.07    | 0.10        |
| <i>Corynebacterium</i>           | 0.097                           | 0.382                           | 0.08    | 0.10        |
| <i>Finegoldia</i>                | 0.000                           | 0.001                           | 0.18    | 0.20        |
| <i>Anaerococcus</i>              | 0.006                           | 0.014                           | 0.60    | 0.60        |

**Comparison of Nasal Microbiota Based on Antibiotic Usage within the Past Year at the Genus Level.** P value was calculated between groups using Wilcoxon rank sum test. Adjusted p value (Adj P value) was calculated using Benjamini-Hochberg adjustment. Abx, antibiotic; Hx, history.



**SI Table 7**

| Genus                            | KTx on TMP/SMX   | KTx off TMP/SMX  | P value | Adj P value |
|----------------------------------|------------------|------------------|---------|-------------|
|                                  | n = 12           | n = 25           |         |             |
|                                  | Median Abundance | Median Abundance |         |             |
| <i>Finegoldia</i>                | 0.000            | 0.002            | 0.02    | 0.15        |
| <i>Peptoniphilus</i>             | 0.000            | 0.000            | 0.04    | 0.15        |
| <i>Anaerococcus</i>              | 0.0002           | 0.007            | 0.06    | 0.15        |
| <i>Corynebacterium</i>           | 0.101            | 0.314            | 0.36    | 0.59        |
| <i>Cutibacterium</i>             | 0.000            | 0.000            | 0.37    | 0.59        |
| <i>Staphylococcus</i>            | 0.363            | 0.487            | 0.53    | 0.71        |
| Unspecified <i>Neisseriaceae</i> | 0.000            | 0.000            | 0.70    | 0.80        |
| <i>Streptococcus</i>             | 0.002            | 0.005            | 0.84    | 0.84        |
| <i>Moraxella</i>                 | 0.000            | 0.000            | NA      | NA          |

**Comparison of Nasal Microbiota Based on Trimethoprim/Sulfamethoxazole usage in the Kidney Transplant Recipients at the Genus Level.** P value was calculated between groups using Wilcoxon rank sum test. Adjusted p value (Adj P value) was calculated using Benjamini-Hochberg adjustment. P values with NA were unable to be calculated because the abundances were 0 in both groups. KTx, Kidney Transplant; TMP/SMX, trimethoprim/sulfamethoxazole.

**SI Table 8**

| Genus                            | PD Staph         | PD No Staph      | P value | Adj P value |
|----------------------------------|------------------|------------------|---------|-------------|
|                                  | Future           | Future           |         |             |
|                                  | Peritonitis      | Peritonitis      |         |             |
|                                  | n = 6            | n = 26           |         |             |
|                                  | Median Abundance | Median Abundance |         |             |
| <i>Unspecified Neisseriaceae</i> | 0.000            | 0.000            | 0.08    | 0.66        |
| <i>Staphylococcus</i>            | 0.521            | 0.240            | 0.38    | 0.73        |
| <i>Streptococcus</i>             | 0.009            | 0.035            | 0.38    | 0.73        |
| <i>Anaerococcus</i>              | 0.0002           | 0.022            | 0.39    | 0.73        |
| <i>Peptoniphilus</i>             | 0.000            | 0.000            | 0.48    | 0.73        |
| <i>Cutibacterium</i>             | 0.001            | 0.000            | 0.55    | 0.73        |
| <i>Finegoldia</i>                | 0.000            | 0.000            | 0.76    | 0.87        |
| <i>Corynebacterium</i>           | 0.101            | 0.098            | 1.00    | 1.00        |
| <i>Moraxella</i>                 | 0.000            | 0.000            | NA      | NA          |

**Comparison of Nasal Microbiota Based on PD patients who developed *Staphylococcus* peritonitis status and PD patients who did not develop *Staphylococcus* peritonitis at the Genus Level.** P value was calculated between groups using Wilcoxon rank sum test. Adjusted p value (Adj P value) was calculated using Benjamini-Hochberg adjustment. P values with NA were unable to be calculated because the abundances were 0 in both groups. PD Staph peritonitis cohort was defined as PD patients who concurrently had *Staphylococcus* peritonitis or developed *Staphylococcus* peritonitis within 10 to 12 months (last follow up).

**SI Table 9**

| Genus                           | PD Patients                                               | PD Patients                                                  | P value | Adj P Value |
|---------------------------------|-----------------------------------------------------------|--------------------------------------------------------------|---------|-------------|
|                                 | History of Peritonitis<br>(n = 10)<br>median<br>abundance | No History of Peritonitis<br>(n = 22)<br>median<br>abundance |         |             |
| <i>Finegoldia</i>               | 0.000                                                     | 0.001                                                        | 0.005   | 0.04        |
| <i>NeisseriaceaeUnspecified</i> | 0.000                                                     | 0.000                                                        | 0.06    | 0.24        |
| <i>Peptoniphilus</i>            | 0.000                                                     | 0.000                                                        | 0.10    | 0.26        |
| <i>Cutibacterium</i>            | 0.000                                                     | 0.002                                                        | 0.14    | 0.28        |
| <i>Corynebacterium</i>          | 0.047                                                     | 0.141                                                        | 0.32    | 0.51        |
| <i>Staphylococcus</i>           | 0.428                                                     | 0.240                                                        | 0.48    | 0.64        |
| <i>Anaerococcus</i>             | 0.020                                                     | 0.013                                                        | 0.76    | 0.86        |
| <i>Streptococcus</i>            | 0.018                                                     | 0.027                                                        | 0.95    | 0.95        |
| <i>Moraxella</i>                | 0.000                                                     | 0.000                                                        | NA      | NA          |

**Comparison of Nasal Microbiota Based on PD patients who had a history of peritonitis and PD patients who did not have a history of peritonitis at the Genus Level.** P value was calculated between groups using Wilcoxon rank sum test. Adjusted p value (Adj P value) was calculated using Benjamini-Hochberg adjustment. P values with NA were unable to be calculated because the abundances were 0 in both groups.
